# Supplementary material for: Predictive and Prognostic Value of Serum Neutrophil Gelatinase-Associated Lipocalin for Contrast-Induced Acute Kidney Injury and Long-Term Clinical Outcomes after Percutaneous Coronary Intervention
Source: MDPI journal article supplement (doi:10.3390/jcm11195971), 2022-10-10
Supplement: s1 [file s1]

**Supplementary Table S1. Baseline clinical and angiographic characteristics**

| Variables                                  | CI-AKI (-)<br>(n=535) | CI-AKI (+)<br>(n=98) | <i>P</i> value |
|--------------------------------------------|-----------------------|----------------------|----------------|
| Age (years)                                | 63.0 ± 11.7           | 68.3 ± 11.8          | 0.011          |
| Male                                       | 359 (67.5%)           | 56 (57.1%)           | 0.050          |
| Body mass index (Kg/m <sup>2</sup> )       | 24.9 ± 3.4            | 24.1 ± 3.8           | 0.028          |
| Hypertension                               | 379 (71.2%)           | 74 (75.5%)           | 0.463          |
| Diabetes mellitus                          | 196 (36.8%)           | 49 (50.0%)           | 0.018          |
| Dyslipidemia                               | 195 (36.7%)           | 24 (24.5%)           | 0.021          |
| Current smoking                            | 149 (28.0%)           | 30 (30.6%)           | 0.626          |
| Family history of coronary artery disease  | 46 (8.6%)             | 7 (7.1%)             | 0.843          |
| Prior stroke                               | 53 (10.0%)            | 12 (12.2%)           | 0.473          |
| Prior myocardial infarction                | 45 (8.5%)             | 7 (7.1%)             | 0.842          |
| Prior percutaneous coronary intervention   | 74 (13.9%)            | 8 (8.2%)             | 0.142          |
| Prior statin use                           | 169 (31.8%)           | 22 (22.4%)           | 0.073          |
| Clinical presentation                      |                       |                      | 0.082          |
| Stable angina pectoris                     | 153 (28.8%)           | 20 (20.4%)           |                |
| Unstable angina pectoris                   | 126 (23.7%)           | 18 (18.4%)           |                |
| NSTEMI                                     | 154 (28.9%)           | 41 (41.8%)           |                |
| STEMI                                      | 88 (16.5%)            | 17 (17.3%)           |                |
| Silent myocardial ischemia                 | 11 (2.1%)             | 2 (2.0%)             |                |
| Ejection fraction (%)                      | 55.8 ± 11.5           | 49.3 ± 14.6          | <0.001         |
| NGAL (ng/mL)                               | 138.0±98.6            | 149.6±88.8           | 0.0279         |
| Total cholesterol (mg/dl)                  | 135.6 ± 33.1          | 130.0 ± 29.4         | 0.246          |
| Triglyceride (mg/dl)                       | 156.4 ± 190.4         | 151.0 ± 95.3         | 0.842          |
| HDL cholesterol (mg/dl)                    | 45.2 ± 10.9           | 41.6 ± 10.1          | 0.030          |
| LDL cholesterol (mg/dl)                    | 73.2 ± 23.4           | 70.7 ± 20.4          | 0.487          |
| High-sensitivity C-reactive protein (mg/l) | 9.5 ± 27.3            | 13.5 ± 31.6          | 0.195          |
| eGFR (mL/min/1.73m <sup>2</sup> )          | 71.5 ± 26.9           | 73.0 ± 34.2          | 0.685          |

|                                    |               |               |       |
|------------------------------------|---------------|---------------|-------|
| eGFR <60 mL/min/1.73m <sup>2</sup> | 186 (34.8%)   | 39 (39.8%)    | 0.359 |
| Hemoglobin (mg/dl)                 | 13.5 ± 2.5    | 13.1 ± 2.3    | 0.107 |
| Medications at discharge           |               |               |       |
| Aspirin                            | 517 (97.2%)   | 96 (98.0%)    | 0.999 |
| Clopidogrel                        | 340 (63.9%)   | 54 (55.1%)    | 0.112 |
| Potent P2Y12 inhibitor             | 191 (35.9%)   | 44 (44.9%)    | 0.111 |
| Statins                            | 527 (99.1%)   | 96 (98.0%)    | 0.299 |
| Beta-blocker                       | 368 (69.2%)   | 74 (75.5%)    | 0.231 |
| Renin angiotensin system inhibitor | 284 (53.4%)   | 59 (60.2%)    | 0.226 |
| Hypotension                        | 55 (10.3%)    | 9 (9.2%)      | 0.856 |
| IABP or ECMO                       | 2 (0.4%)      | 1 (1.0%)      | 0.398 |
| Culprit coronary lesion            |               |               | 0.068 |
| Left anterior descending           | 248 (47.6%)   | 58 (59.8%)    |       |
| Left circumflex                    | 99 (19.0%)    | 21 (21.6%)    |       |
| Right                              | 147 (28.2%)   | 16 (16.5%)    |       |
| Left main                          | 26 (5.0%)     | 2 (2.1%)      |       |
| Multivessel                        | 168 (31.6%)   | 36 (36.7%)    | 0.348 |
| Contrast volume (ml)               | 217.9 ± 121.0 | 220.8 ± 115.6 | 0.831 |
| Number of total stents             | 1.70 ± 1.03   | 1.82 ± 1.11   | 0.305 |
| Mean diameter of stents (mm)       | 3.11 ± 0.43   | 3.08 ± 0.38   | 0.473 |
| Total length of stents (mm)        | 43.6 ± 30.4   | 48.3 ± 36.6   | 0.175 |

---

Note: Values are number (%) or mean ± standard deviation

Abbreviation: NSTEMI, non-ST-segment elevation myocardial infarction; STEMI, ST-segment elevation myocardial infarction; HDL, high-density lipoprotein; LDL, low-density lipoprotein; eGFR, estimated glomerular filtration rate; IABP, intra-aortic balloon pump; ECMO, extracorporeal membrane oxygenation.
